# Supplementary material
Source: Research Square preprint supplement (doi:10.21203/rs.3.rs-9331302/v1)
Supplement: Supplementary file 1 [file a461a00d36e6f1ad7eeef333.docx]

**APPENDIX**

This appendix reports the additional robustness evidence referenced in Section 4.2.

**Appendix Table A1. HS10 Robustness Across Scored Subsamples**

*Dependent variable: ln(unit value)*

**Panel A. H1**

| Variables | S1 | S2 | S3 | S4 | S5 |
| --- | --- | --- | --- | --- | --- |
| ln(dist) | 0.2849*** | 0.2962*** | 0.1897*** | 0.1979*** | 0.2060*** |
|  | (0.0202) | (0.0204) | (0.0226) | (0.0225) | (0.0226) |
| Observations | 10,655,711 | 10,406,217 | 6,905,933 | 6,863,656 | 6,761,359 |
| Within R² | 0.002 | 0.002 | 0.001 | 0.001 | 0.001 |

**Panel B. H2**

| Variables | S1 | S2 | S3 | S4 | S5 |
| --- | --- | --- | --- | --- | --- |
| ln(dist)_c | 0.1687*** | 0.1756*** | 0.2127*** | 0.2241*** | 0.2329*** |
|  | (0.0273) | (0.0275) | (0.0303) | (0.0302) | (0.0303) |
| Air (dummy) | -0.2477*** | -0.2517*** | -0.3056*** | -0.3058*** | -0.3062*** |
|  | (0.0094) | (0.0096) | (0.0111) | (0.0112) | (0.0113) |
| Air × ln(dist)_c | 0.2502*** | 0.2610*** | 0.0510 | 0.0444 | 0.0418 |
|  | (0.0332) | (0.0334) | (0.0348) | (0.0349) | (0.0351) |
| Observations | 10,655,711 | 10,406,217 | 6,905,933 | 6,863,656 | 6,761,359 |
| Within R² | 0.046 | 0.049 | 0.062 | 0.063 | 0.063 |

**Notes:** Standard errors are reported in parentheses. *** p<0.01, ** p<0.05, * p<0.10. All regressions include HS10 product fixed effects and year fixed effects; standard errors are clustered at the HS6 level.

**Appendix Figure A1. HS2 Air-Transport Interaction Across Scored Subsamples**


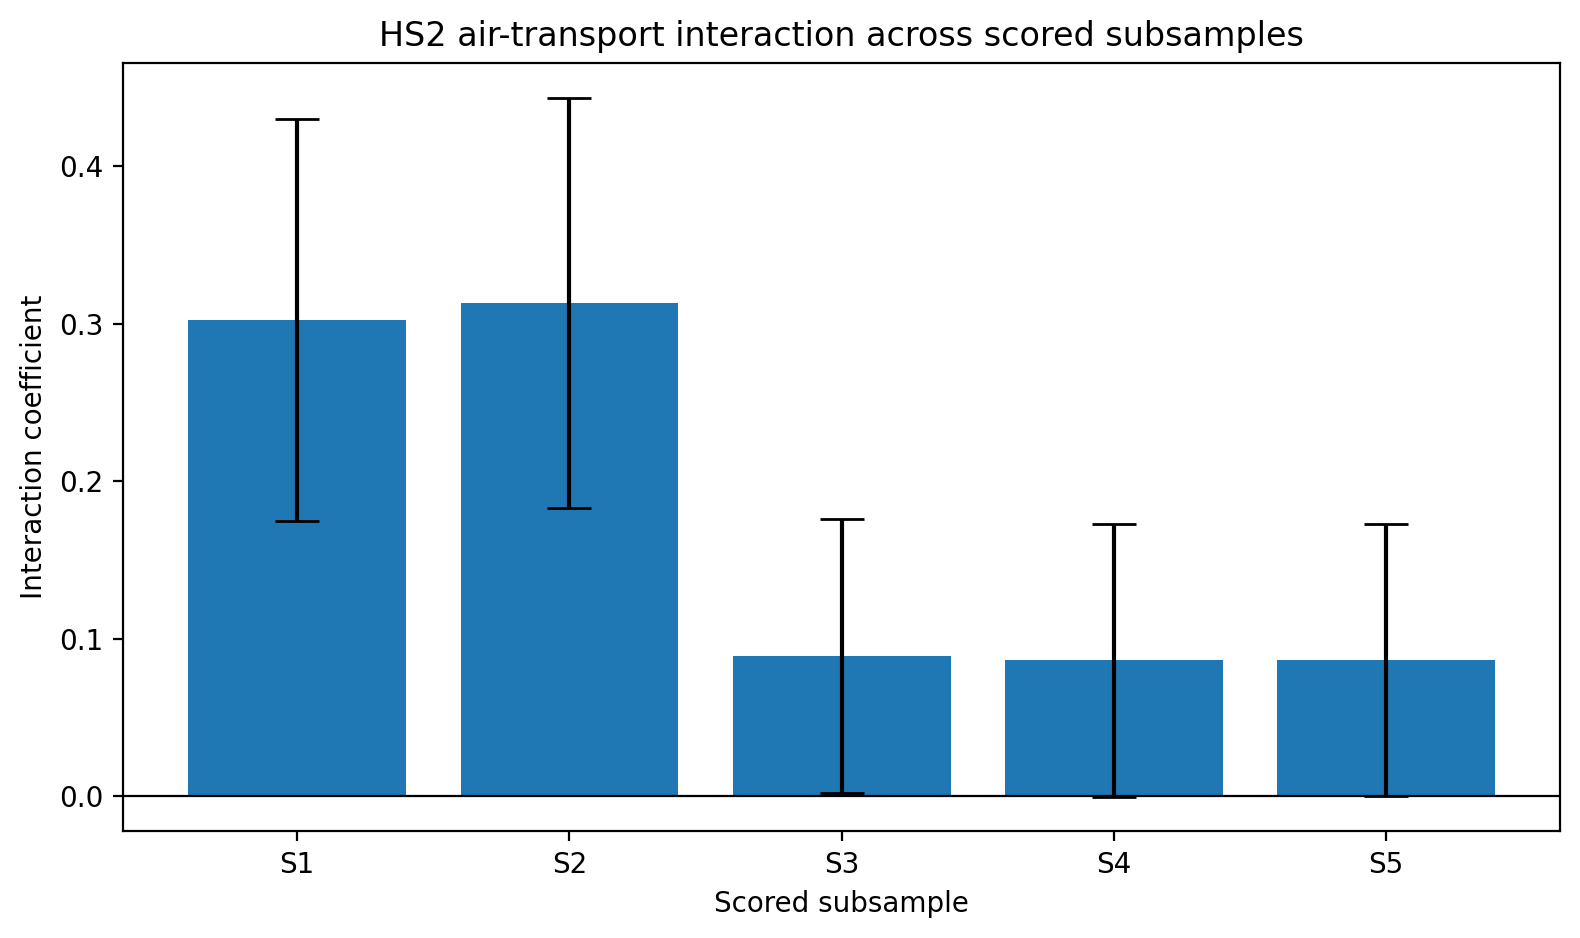


**Notes:** The figure plots the coefficient on Air × ln(dist)_c from the HS2 robustness specification across the five scored subsamples S1–S5. Error bars correspond to one standard error. The interaction is positive in every subsample and statistically significant in the two broadest samples, S1 and S2.
